# Supplementary material for: Mn–Ce oxide-modified activated carbon composites as efficient adsorbents for removing As(iii) from water: adsorption performance and mechanisms
Source: Royal Society of Chemistry journal article supplement (doi:10.1039/d3nj01148h), 2023-01-01
Supplement: d3nj01148h1.pdf [file d3nj01148h1.pdf]

## Supporting information

### **Mn-Ce oxide-modified activated carbon composites as efficient adsorbents for removing As(III) from water: Adsorption performance and mechanisms**

Shengfeng Yang<sup>a</sup>, Wei Fang<sup>b</sup>, Qianwei Liang<sup>c\*</sup>, Lin Lin<sup>a</sup>, Mengqing Sun<sup>a</sup>, Yujia Xing<sup>a</sup>, Hanjin Luo<sup>a,d\*</sup>

*a School of Environment and Energy, South China University of Technology, Guangzhou 510006, China*

*b South China Institute of Environmental Sciences, Ministry of Ecology and Environment, Guangzhou 510655, China*

*c College of Geography and Environmental Sciences, Zhejiang Normal University, Jinhua 321004, China*

*d The Key Laboratory of Pollution Control and Ecosystem Restoration in Industry Clusters of Ministry of Education, Guangzhou 510006, China*

---

\*Corresponding author.

E-mail: qwliang@zjnu.edu.cn (Q. Liang); luohj@scut.edu.cn (H. Luo).

### **Text S1. Materials and chemicals**

Active carbon (AC) powder (200 mesh) was purchased from Tianjinshi Baishi Chemical Co., Ltd. (Tianjin, China). Cerium nitrate hexahydrate ( $\text{CeN}_3\text{O}_9 \cdot 6\text{H}_2\text{O}$ ) and Urea ( $\text{CON}_2\text{H}_4$ ) were purchased from Aladdin (Shanghai, China). Potassium permanganate ( $\text{KMnO}_4$ ) were purchased Guangzhou Chemical Reagent Factory (Guangzhou, China). Sodium arsenite ( $\text{NaAsO}_2$ ) were purchased from Sigma-Aldrich Co., Ltd. (Germany).  $\text{Cl}^-$ ,  $\text{F}^-$ ,  $\text{NO}_3^-$ ,  $\text{SO}_4^{2-}$  and  $\text{PO}_4^{3-}$  standard solution were purchased from Guobiao Testing & Certification Co., Ltd. (Beijing, China). All reagents used in the experiments are analytically pure reagents, and the water used in this work is deionized (DI) water.

### **Text S2. Characterization methods**

Field emission scanning electron microscopy (FESEM, Merlin, Germany) were used to exam the morphologies and structural characterization of the samples. X-ray diffraction (XRD) analysis was conducted by using an X-ray powder diffractometer (Bruker D8, Germany) equipped with Cu  $K\alpha$  radiation at a scanning range from  $5^\circ$  to  $90^\circ$ , operated at voltage of 40 kV and applied potential current of 40 mA. The surface area of the sample was analyzed by Brunauer-Emmett-Teller (BET, Tristar II Plus, Micromeritics, USA) method by  $\text{N}_2$  gas adsorption at 77.35 K using high-speed surface analyzer. Fourier transform infrared spectra (FT-IR, Nicolet-460, Thermo Fisher, USA) was used to measure the infrared spectra of these powders. The X-ray photoelectron spectroscopy (XPS, Escalab Xi+, USA) was recorded on the Escalab 250Xi spectrometer with monochromatic Al  $K\alpha$  radiation. The atomic absorption spectrometer (PinAAcle 900T, Perkin Elmer, Singapore) measured the leakage of loaded-Mn in the reaction system. Inductively coupled plasma emission spectrometer (iCAP 7200 Duo, Thermofisher Scientific, USA) measured the leakage of loaded-Ce in the reaction system.

## Supporting figures

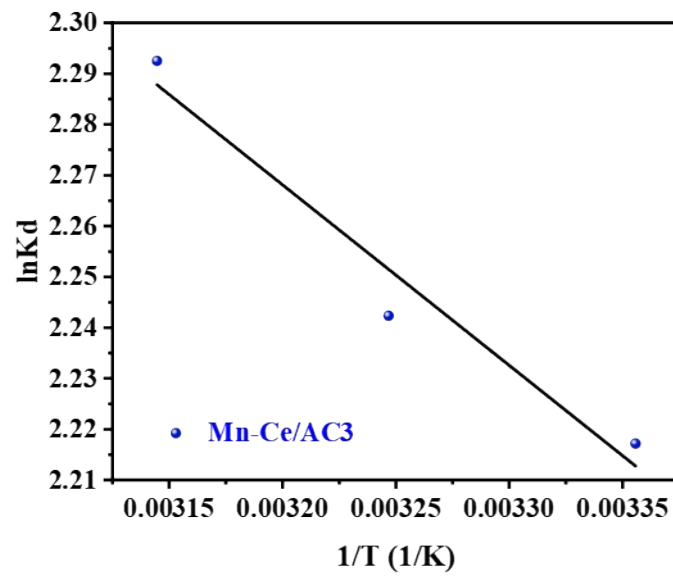

Fig. S1. Thermodynamic plot of As(III) adsorption by Mn-Ce/AC3.

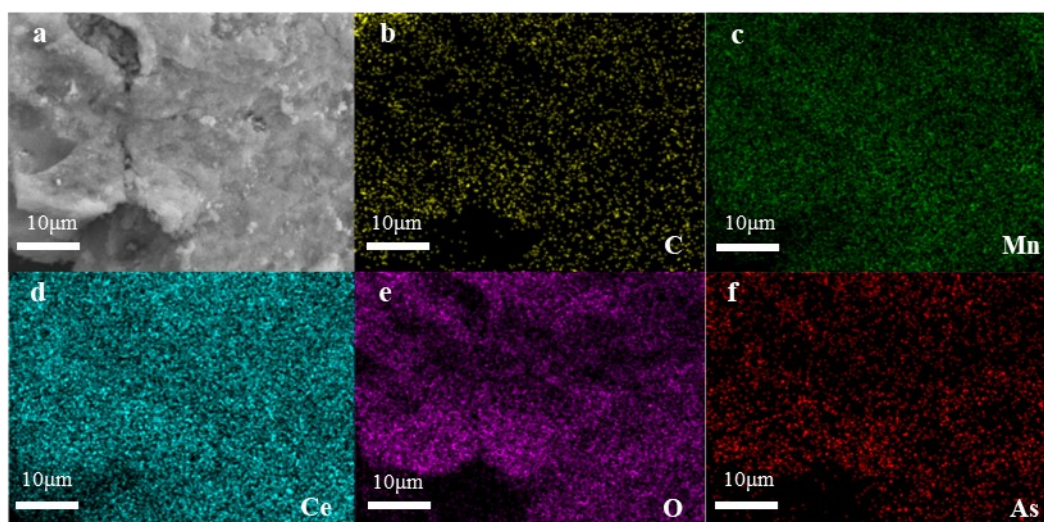

**Fig. S2** Elemental mapping images of Mn-Ce/AC3-As(III).

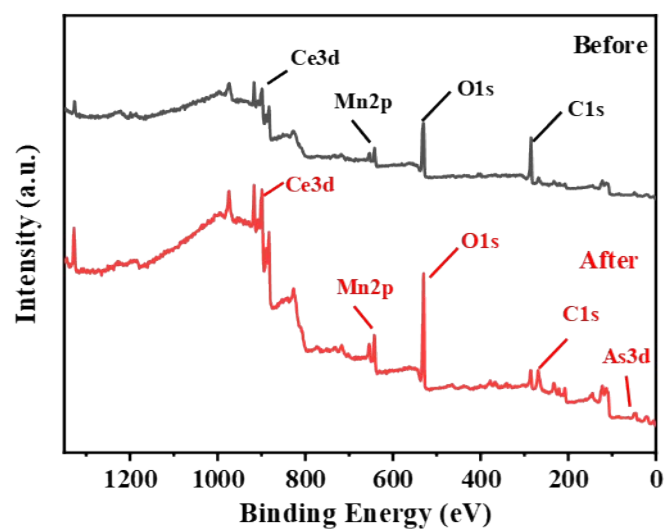

**Fig. S3** Full-range XPS spectra of fresh Mn-Ce/AC3 and Mn-Ce/AC3 after adsorption of As(III).

## Supporting tables

**Table S1.** BET surface area, total pore volume and average pore diameter of AC, Mn-Ce/AC1, Mn-Ce/AC3, Mn-Ce/AC5 and Mn-Ce/AC7.

| Sample    | Average pore size (nm) | BET surface area (m <sup>2</sup> /g) | Pore volume (cm <sup>3</sup> /g) |
|-----------|------------------------|--------------------------------------|----------------------------------|
| AC        | 7.33                   | 9.63                                 | 0.01144                          |
| Mn-Ce/AC1 | 12.69                  | 124.99                               | 0.3725                           |
| Mn-Ce/AC3 | 10.33                  | 213.25                               | 0.5903                           |
| Mn-Ce/AC5 | 10.75                  | 135.44                               | 0.3253                           |
| Mn-Ce/AC7 | 13.82                  | 53.16                                | 0.1975                           |

**Table S2.** Comparison of maximum arsenic adsorption capacities for different adsorbents.

| <b>Adsorbent</b>                                                 | <b>Maximum As(III)<br/>adsorption<br/>capacity (mg/g)</b> | <b>pH</b> | <b>Reference<br/>s</b>   |
|------------------------------------------------------------------|-----------------------------------------------------------|-----------|--------------------------|
| Mn-Ce oxide-modified activated carbon                            | 73.16                                                     | 7.0       | <b>Present<br/>study</b> |
| Fe–Mn–Ce oxide-modified biochar composite                        | 8.74                                                      | 3         | 1                        |
| Cerium oxide modified activated carbon                           | 36.77                                                     | 5.0       | 2                        |
| Cerium modified chitosan                                         | 57.50                                                     | 8.0       | 3                        |
| Manganese oxide-coated-alumina (MOCA)                            | 42.48                                                     | 4~7.5     | 4                        |
| Ce-Mn binary oxide                                               | 97.70                                                     | 8.0       | 5                        |
| Ti(IV)-Mn(IV) binary oxide                                       | 107.00                                                    | 7.0       | 6                        |
| Mn-doped mesoporous iron oxides                                  | 59.44                                                     | 3.0       | 7                        |
| Ce–Fe mixed oxide decorated multiwalled<br>carbon nanotubes      | 28.74                                                     | 7.5       | 8                        |
| Magnetic nanoparticles modified<br>with Fe-Mn binary oxide       | 56.00                                                     | 7.0       | 9                        |
| Starch-FeMnOx/RGO                                                | 78.74                                                     | 7.0       | 10                       |
| Iron hydroxide/manganese dioxide doped straw<br>activated carbon | 75.82                                                     | 3.0       | 11                       |
| MnOx and CeOx anchored on multi-walled<br>carbon nanotubes       | 151.06                                                    | 7.0       | 12                       |

**Table S3.** Peak parameters for As, Mn, Ce and O in Mn-Ce/AC3.

| Element | Species          | Mn-Ce/AC3 |             | Mn-Ce/AC3-As(III) |             |
|---------|------------------|-----------|-------------|-------------------|-------------|
|         |                  | BE (eV)   | Content (%) | BE (eV)           | Content (%) |
| As      | As(V)            | ----      | ----        | 44.30             | 43.2        |
|         | As(III)          | ----      | ----        | 45.24             | 56.8        |
| Mn      | Mn(IV)           | 654.5     | 43.94       | 654.5             | 40.83       |
|         |                  | 642.2     |             | 642.2             |             |
|         | Mn(III)          | 654.1     | 37.88       | 654.1             | 41.67       |
|         |                  | 641.8     |             | 641.8             |             |
| Mn(II)  | 653.0            | 18.18     | 653.0       | 17.50             |             |
|         | 641.2            |           | 641.2       |                   |             |
| Ce      | Ce(IV)           | 882.53    | 75.19       | 882.68            | 63.80       |
|         |                  | 889.03    |             | 889.07            |             |
|         |                  | 896.43    |             | 896.84            |             |
|         |                  | 901.01    |             | 901.21            |             |
|         |                  | 907.80    |             | 907.82            |             |
|         |                  | 916.70    |             | 916.90            |             |
|         | Ce(III)          | 881.24    | 24.81       | 880.64            | 36.20       |
|         |                  | 884.79    |             | 884.78            |             |
|         |                  | 898.40    |             | 898.70            |             |
|         |                  | 903.20    |             | 903.23            |             |
| O       | H <sub>2</sub> O | 532.4     | 25.28       | 532.1             | 30.2        |
|         | -OH              | 531.4     | 37.73       | 530.8             | 25.57       |
|         | O <sup>2-</sup>  | 529.5     | 36.98       | 529.6             | 37.4        |



## References

1. X. Liu, M. Gao, W. Qiu, Z. H. Khan, N. Liu, L. Lin and Z. Song, *Environ Sci Pollut Res Int*, 2019, **26**, 17373-17382.
2. Y. Yu, C. Zhang, L. Yang and J. Paul Chen, *Chem Eng J*, 2017, **315**, 630-638.
3. L. Zhang, T. Zhu, X. Liu and W. Zhang, *J Hazard Mater*, 2016, **308**, 1-10.
4. S. M. Maliyekkal, L. Philip and T. Pradeep, *Chem Eng J*, 2009, **153**, 101-107.
5. J. Chen, J. Wang, G. Zhang, Q. Wu and D. Wang, *Chem Eng J*, 2018, **334**, 1518-1526.
6. W. Zhang, C. Liu, T. Zheng, J. Ma, G. Zhang, G. Ren, L. Wang and Y. Liu, *J Hazard Mater*, 2018, **353**, 410-420.
7. X. Xie, C. Lu, R. Xu, X. Yang, L. Yan and C. Su, *Sci Total Environ*, 2022, **806**, 150615.
8. B. Chen, Z. Zhu, J. Ma, Y. Qiu and J. Chen, *J Mater Chem A*, 2013, **1**, 11355-11367.
9. J. Nikic, M. A. Watson, M. K. Isakovski, A. Tubic, M. Solic, B. Kordic and J. Agbaba, *Environ Technol*, 2021, **42**, 2527-2539.
10. Z. Lou, Z. Cao, J. Xu, X. Zhou, J. Zhu, X. Liu, S. Ali Baig, J. Zhou and X. Xu, *Chem Eng J*, 2017, **322**, 710-721.
11. Y. Xiong, Q. Tong, W. Shan, Z. Xing, Y. Wang, S. Wen and Z. Lou, *Appl Surf Sci*, 2017, **416**, 618-627.
12. X. Liang, Q. Ye, Y. Zhao, Z. Yang and Q. Yang, *Surf Interfaces*, 2022, **30**.
