# Supplementary figures and images for: Mn–Ce oxide-modified activated carbon composites as efficient adsorbents for removing As(iii) from water: adsorption performance and mechanisms
Source: Royal Society of Chemistry journal article supplement (doi:10.1039/d3nj01148h), 2023-01-01

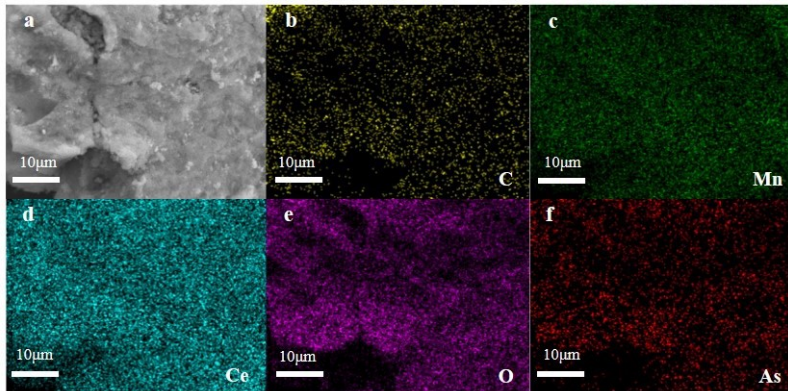

Supplement: d3nj01148h4.pdf [file d3nj01148h4.pdf]

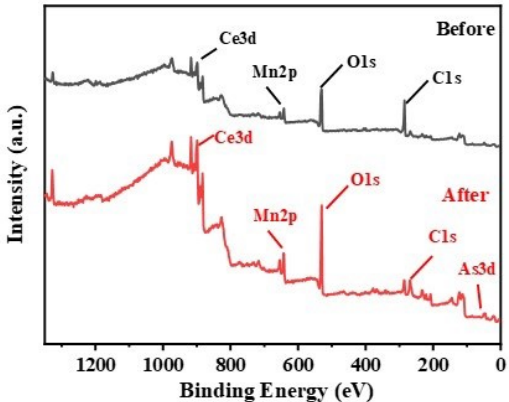

Supplement: d3nj01148h5.pdf [file d3nj01148h5.pdf]
